# Supplementary material for: An overview of the vertical structure of the atmospheric boundary layer in the central Arctic during MOSAiC
Source: Copernicus journal article supplement (doi:10.5194/acp-24-1429-2024), 2024-01-30
Supplement: Supplementary file 1 [file acp-24-1429-2024-supplement.pdf]

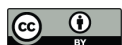

*Supplement of*

## **An overview of the vertical structure of the atmospheric boundary layer in the central Arctic during MOSAiC**

**Gina C. Jozef et al.**

*Correspondence to:* Gina C. Jozef ([gina.jozef@colorado.edu](mailto:gina.jozef@colorado.edu))

The copyright of individual parts of the supplement might differ from the article licence.

## Supplement for: An Overview of the Vertical Structure of the Atmospheric Boundary Layer in the Central Arctic during MOSAiC

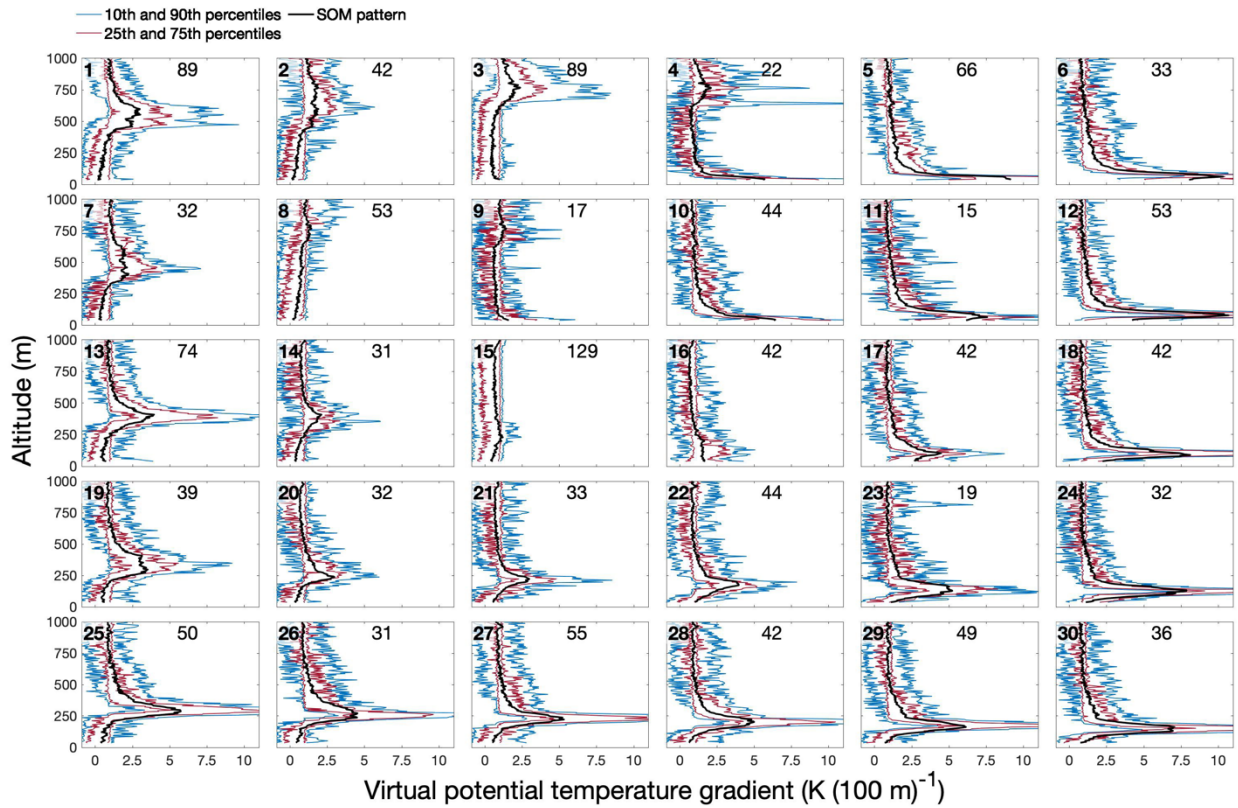

5 **Figure S1.** The 30 SOM patterns resulting from training with 1377 MOSAiC  $d\theta_v/dz$  profiles. On each subplot, the black line is the SOM defined profile of  $d\theta_v/dz$ . The 10<sup>th</sup> and 90<sup>th</sup> percentiles (blue) and the 25<sup>th</sup> and 75<sup>th</sup> percentiles (red) are shown for all radiosonde data that maps to each pattern. The bold number in the upper lefthand corner of each subplot is the number of that pattern (1 through 30), and the number in the upper center of each subplot is the number of radiosonde profiles which map to that pattern.

10

# Statistical significance of ABL features

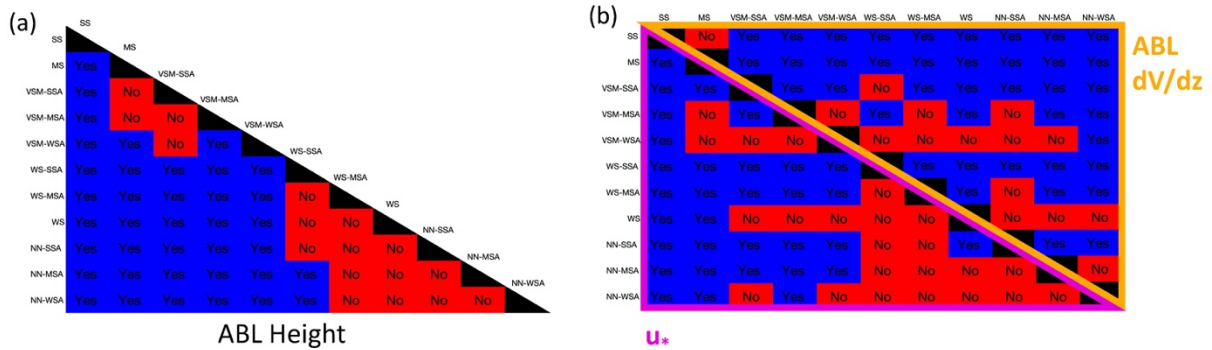

15 **Figure S2.** Grid plots indicating whether the means of (a) ABL height, (b)  $u_*$  (pink outline) and  $dV/dz$  over the depth of the ABL (yellow outline) are statistically significantly different between stability regimes, where blue shading and the word “yes” indicate that the means are significantly different and red shading and the word “no” indicate that the means are not significantly different.
